# Supplementary material
Source: HighWire-hosted journal article supplement (doi:10.1101/rna.076026.120)
Supplement: Supplemental_Figure_Legends.docx [file Supplemental_Figure_Legends.docx]

**Supplemental Figure 1.** Additional Scatchard plots and binding models for the different antibodies, determining the KD-value. The figure shows Scatchard plots and binding models of the antibodies to determine the KD-values, which are shown in figure 2H. (A-C) Scatchard Plots (upper graphs) and binding models (lower graphs) of the m6A antibodies 9B7, 13G2 and 11D11. (D-F) The same is shown for the m5C antibodies 32E2, 31B10 and 28F6. (G and H) KD determination of α-Ψ antibody clones 26H5 and 27C8. (I) Scatchard plot and binding model for the m26A antibody 60G3.

**Supplemental Figure 2.** Estimation of the enrichment via Thin-Layer Chromatography (TLC). (A) Thin layer chromatography (left panel) and the graphical evaluation (right panel) of m6A IPs and comparison of self-established m6A antibodies (α-m6A 11D11, α-m6A 13G2 and α-m6A 9B7) vs. a polyclonal m6A-antibody from Synaptic Systems. The commercial antibody and clone 9B7 are shown in Figure 4. (B) TLC and evaluation of TLCs using 1 % m6ATP for the *in vitro* transcription (ivt). Experiments were conducted in triplicates. (C) Determination of the enrichment factors of the different antibodies against m5C using 1 % m5CTP for ivt and comparison with the commercial monoclonal antibody (33D3, Diagenode). Evaluation based on triplicates of RNA-IP and TLC experiments. (D) TLC of a titration assay using m5C antibody 32E2. The ratio of m5C to unmodified C in the *in vitro* transcription was varied between 10 and 50 %. The RNA was titrated from 2.5 to 16 µg total input for each setup. Below, the evaluation and graphical depiction of the TLCs are shown. (E) Analyses of RNA-IP and TLC experiments conducted with different antibodies against Ψ and determination of the enrichment factors. In the left part, 1 % ΨTP, in the right part, 50 % ΨTP was used for ivt*.*

**Supplemental Figure 3.** RIP and CLIP experiments using m6A-specific antibodies. **(A)** RNA oligonucleotides were incubated with the indicated antibodies and enrichment was calculated as shown in Figure 4B-F. Total RNA from HEK 293 cells was added to simulate a natural RNA environment.(B-D)Comparing m6A-specific antibodies in miCLIP experiments. Venn diagram showing the overlap of peaks identified by miCLIP using the commercial (Abcam) antibody (B) and biotinylated-9B7 or 19B7 monoclonal antibodies. (D) An alignment of corresponding m6A peaks from different antibodies over the Cdk9 transcript is shown in B. Red dots indicate mutation sites on the transcript. C-to-T transition on the motif is shown in red letters.

**Supplemental Figure 4.** Immunofluorescences of MTF cells stained with α-m6A antibodies detecting genomic m6A. (A) Exemplary immunofluorescence images of RNaseA treated and non-treated mouse tail fibroblasts (MTFs), stained with the α-m6A antibody 19B7 diluted 1:250. An Alexa Fluor 488 conjugated secondary antibody was used to visualize the primary antibody. DNA was stained with DAPI (scalebar, 10 µm). (B) Boxplots showing the normalized mean nuclear Alexa Fluor 488 intensities in MTF cells treated with or without RNaseA. Nuclear levels were normalized against cells stained without any primary antibody (“2° only”). The outcome for the three tested antibody dilutions, 1:100, 1:250, 1:500, is shown (n > 15000). The dashed line indicates the median of “2nd only” cells. (C) Boxplot showing the mean nuclear levels of propidium iodide in cells treated with or without RNaseA (n > 60000). Significance was tested with student’s t-test. (D) Boxplot showing the mean nuclear levels of propidium iodide in cells treated with or without RNaseA (n > 60000) of the cells, shown in Figure 6F.
